# Supplementary material
Source: publisher figshare collection journal article supplement (https://acs.figshare.com/ndownloader/files/4521523)

## Supporting Information Available for

**Design and Synthesis of A Stable Supramolecular Trigonal Prism Formed by the Self-Assembly of A Linear Tetrakis( $\text{Zn}^{2+}$ -cyclen) Complex and Trianionic Trithiocyanuric Acid in Aqueous Solution and Its Complexation with DNA (Cyclen = 1,4,7,10-Tetraazacyclododecane).**

**Mohd Zulkefeli,<sup>a,b</sup> Tetsuya Sogon,<sup>c</sup> Kei Takeda,<sup>c</sup> Eiichi Kimura,<sup>c</sup> and Shin Aoki<sup>\*a,d</sup>**

<sup>a</sup> Faculty of Pharmaceutical Sciences, Tokyo University of Science,  
2641 Yamazaki, Noda, Chiba, 278-8510 Japan,

<sup>b</sup> Faculty of Pharmacy, Universiti Teknologi MARA,  
Puncak Alam, Selangor, 42300, Malaysia,

<sup>c</sup> Division of Medicinal Chemistry, Graduate School of Biomedical Sciences,  
Hiroshima University, 1-2-3 Kasumi, Minami-ku, Hiroshima, 734-8551 Japan,

<sup>d</sup> Center for Technologies against Cancer, Tokyo University of Science,  
2641 Yamazaki, Noda, Chiba, 278-8510 Japan.

**Page 3: Figure S1.** (a) UV spectral change in supramolecular trigonal prism **7** (10  $\mu\text{M}$ ) in the absence (bold curve) and upon the addition of succinimide (0~100 mM) in 10 mM HEPES (pH 7.4) with  $I = 0.1$  ( $\text{NaNO}_3$ ) at 25  $^\circ\text{C}$ . (b) UV spectral change of supramolecular trigonal prism **5** (10  $\mu\text{M}$ ) in the absence (bold curve) and upon the addition of succinimide (0~100 mM) in 10 mM HEPES (pH 7.4) with  $I = 0.1$  ( $\text{NaNO}_3$ ) at 25  $^\circ\text{C}$ . (c) Absorption change at 323 nm of **7** (open circle) and **5** (close circle) upon additional of succinimide

(0~100 mM) in 10 mM HEPES (pH 7.4) with  $I = 0.1$  ( $\text{NaNO}_3$ ) at 25 °C.

**Page 4: Figure S2.** (a) UV spectral change in supramolecular trigonal prism **7** (10  $\mu\text{M}$ ) in the absence (bold curve) and upon the addition of dithiothreitol (0~10 mM) in 10 mM HEPES (pH 7.4) with  $I = 0.1$  ( $\text{NaNO}_3$ ) at 25 °C. (b) UV spectral change in supramolecular trigonal prism **5** (10  $\mu\text{M}$ ) in the absence (bold curve) and upon the addition of dithiothreitol (0~10 mM) in 10 mM HEPES (pH 7.4) with  $I = 0.1$  ( $\text{NaNO}_3$ ) at 25 °C. (c) Absorption change at 323 nm in **7** (open circle) and **5** (close circle) upon the additional of dithiothreitol (0~10 mM) in 10 mM HEPES (pH 7.4) with  $I = 0.1$  ( $\text{NaNO}_3$ ) at 25 °C.

**Page 5: Figure S3.** Particle diameter distribution of ctDNA in intensity by dynamic light scattering (DSL) upon the addition of **7** and DNA-binders. (a) 100  $\mu\text{M}$  (in phosphate) ctDNA, (b) EB + ctDNA (plain curve), pentamidine + ctDNA (bold curve), and spermine + ctDNA (dashed curve), and (c) **7** + ctDNA, in 10 mM HEPES (pH 7.4) with  $I = 0.02$  ( $\text{NaNO}_3$ ) at 25 °C and  $r = 0.1$  ( $r = [\text{additive}]/[\text{ctDNA in phosphate}]$ ).

**Page 6: Figure S4.** Circular dichroism (CD) spectra of ctDNA in the absence and presence of prism **7** and DNA-binders: 100  $\mu\text{M}$  (in phosphate) ctDNA (bold curve), ctDNA + pentamidine (dashed curve), ctDNA + spermine (plain curve), and ctDNA + **7** (bold dashed curve), in 10 mM HEPES (pH 7.4) with  $I = 0.02$  ( $\text{NaNO}_3$ ) at 25 °C and  $r = 0.1$  ( $r = [\text{additive}]/[\text{ctDNA in phosphate}]$ ).

**Figure S1.** (a) UV spectral change in supramolecular trigonal prism **7** (10  $\mu\text{M}$ ) in the absence (bold curve) and upon the addition of succinimide (0~100 mM) in 10 mM HEPES (pH 7.4) with  $I = 0.1$  ( $\text{NaNO}_3$ ) at 25  $^\circ\text{C}$ . (b) UV spectral change in supramolecular trigonal prism **5** (10  $\mu\text{M}$ ) in the absence (bold curve) and upon the addition of succinimide (0~100 mM) in 10 mM HEPES (pH 7.4) with  $I = 0.1$  ( $\text{NaNO}_3$ ) at 25  $^\circ\text{C}$ . (c) Absorption change at 323 nm in **7** (open circle) and **5** (close circle) upon the additional of succinimide (0~100 mM) in 10 mM HEPES (pH 7.4) with  $I = 0.1$  ( $\text{NaNO}_3$ ) at 25  $^\circ\text{C}$ .

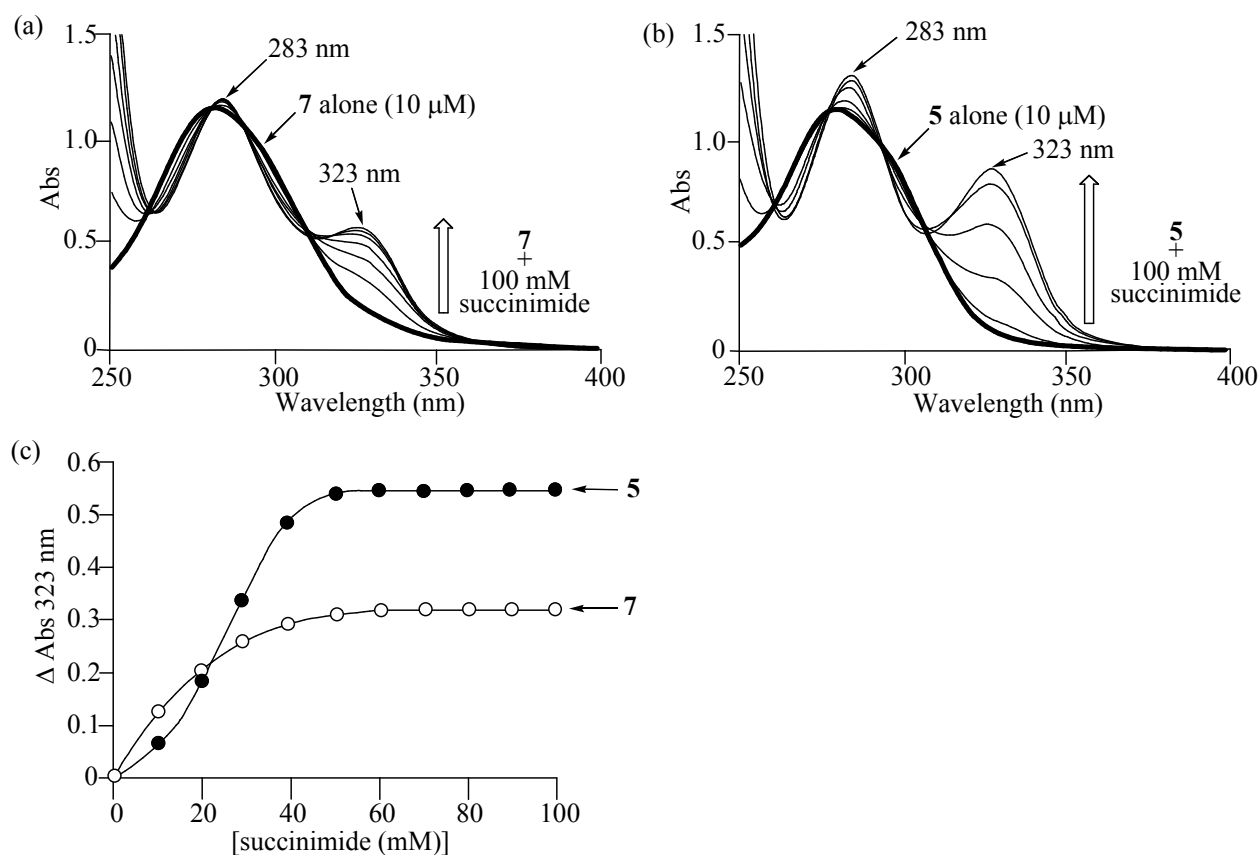

**Figure S2.** (a) UV spectral change in supramolecular trigonal prism **7** (10  $\mu$ M) in the absence (bold curve) and upon the addition of dithiothreitol (0~10 mM) in 10 mM HEPES (pH 7.4) with  $I = 0.1$  (NaNO<sub>3</sub>) at 25  $^{\circ}$ C. (b) UV spectral change in supramolecular trigonal prism **5** (10  $\mu$ M) in the absence (bold curve) and upon the addition of dithiothreitol (0~10 mM) in 10 mM HEPES (pH 7.4) with  $I = 0.1$  (NaNO<sub>3</sub>) at 25  $^{\circ}$ C. (c) Absorption change at 323 nm of **7** (open circle) and **5** (close circle) upon the additional of dithiothreitol (0~10 mM) in 10 mM HEPES (pH 7.4) with  $I = 0.1$  (NaNO<sub>3</sub>) at 25  $^{\circ}$ C.

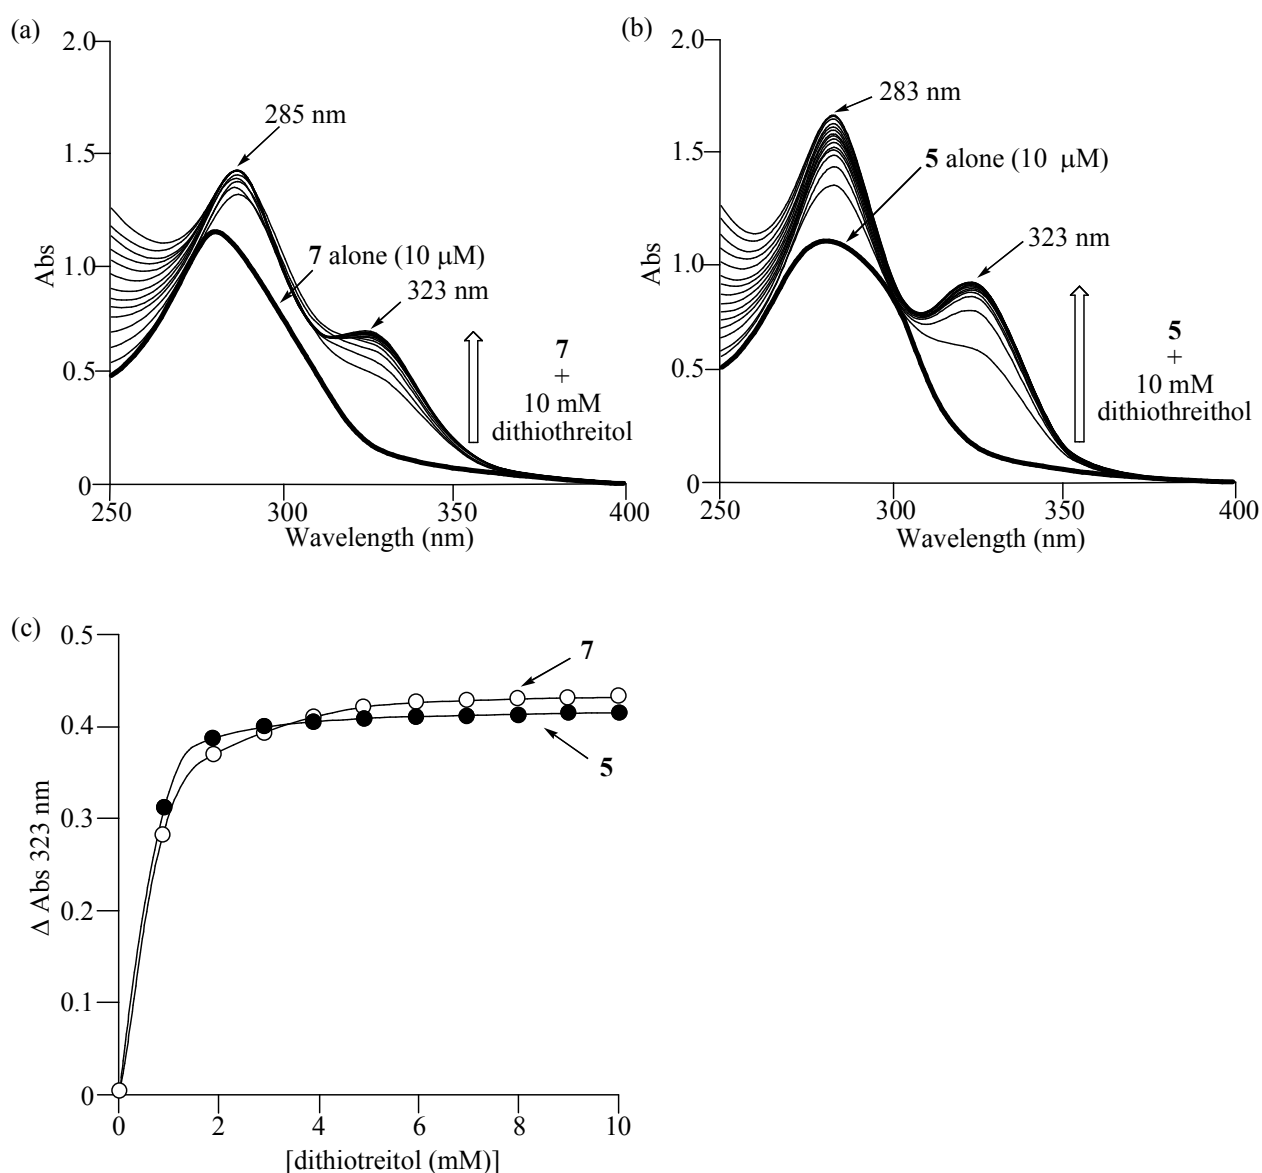

**Figure S3.** Particle diameter distribution of ctDNA in intensity by dynamic light scattering (DSL) upon the addition of **7** and DNA-binders. (a) 100  $\mu\text{M}$  (in phosphate) ctDNA, (b) EB + ctDNA (plain curve), pentamidine + ctDNA (bold curve), and spermine + ctDNA (dashed curve), and (c) **7** + ctDNA, in 10 mM HEPES (pH 7.4) with  $I = 0.02$  ( $\text{NaNO}_3$ ) at 25  $^\circ\text{C}$  and  $r = 0.1$  ( $r = [\text{additive}]/[\text{ctDNA in phosphate}]$ ).

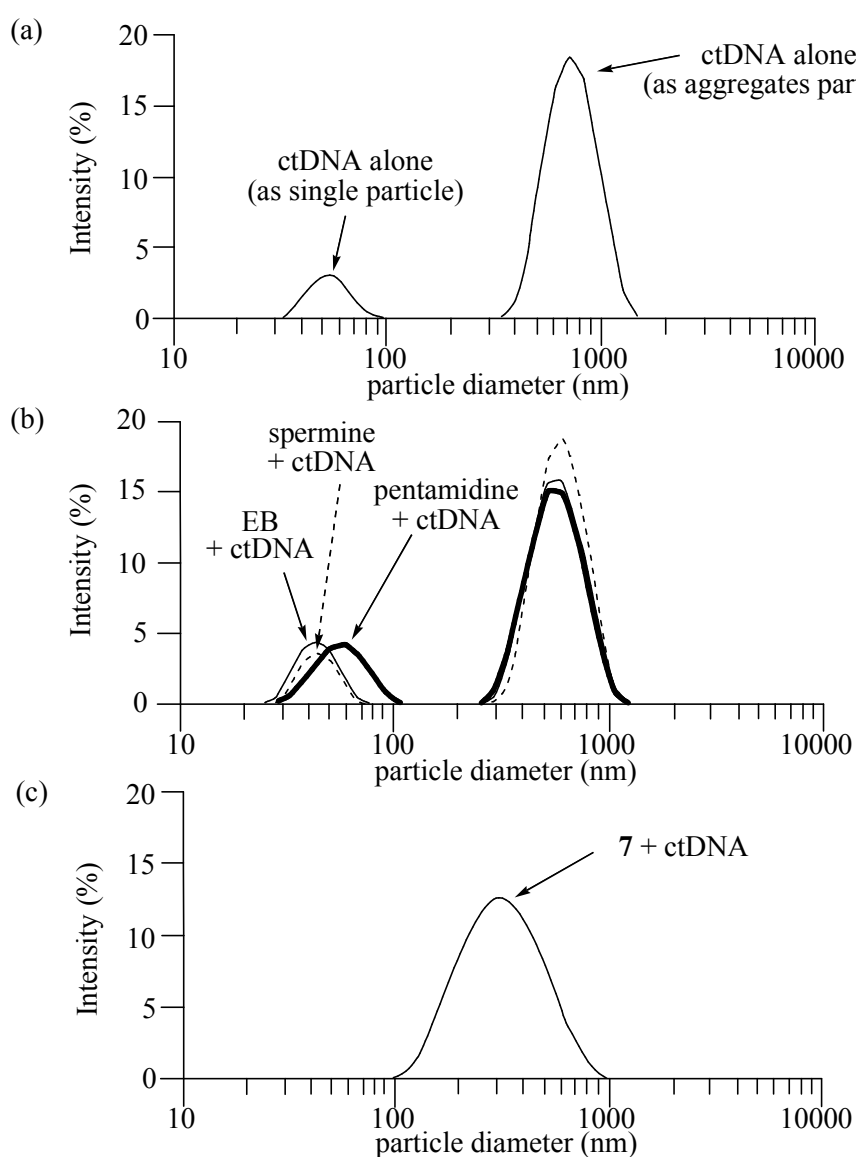

**Figure S4.** Circular dichroism (CD) spectra of ctDNA in the absence and presence of prism **7** and DNA-binders: 100  $\mu\text{M}$  (in phosphate) ctDNA (bold curve), ctDNA + pentamidine (dashed curve), ctDNA + spermine (plain curve), and ctDNA + **7** (bold dashed curve), in 10 mM HEPES (pH 7.4) with  $I = 0.02$  ( $\text{NaNO}_3$ ) at 25  $^\circ\text{C}$  and  $r = 0.1$  ( $r = [\text{additive}]/[\text{ctDNA in phosphate}]$ ).

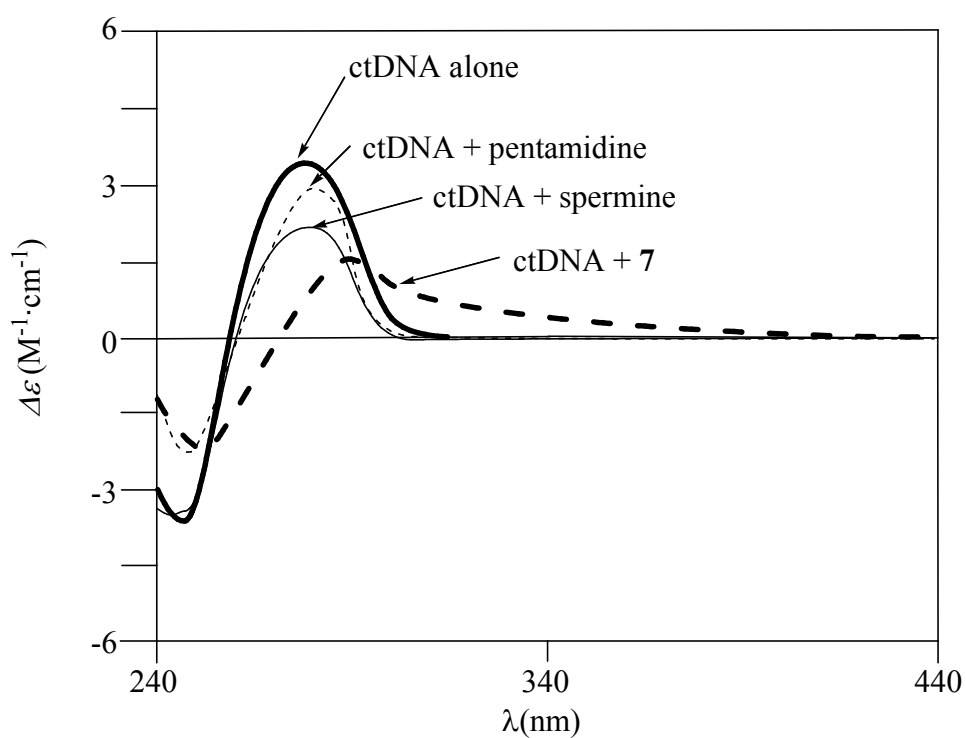

Supplement: Supplementary file 1 [file 4521523]
